# Supplementary material for: Low defects density CsPbBr3 single crystals grown by an additive assisted method for gamma-ray detection
Source: Royal Society of Chemistry journal article supplement (doi:10.1039/d0tc02706e), 2020-01-01
Supplement: d0tc02706e1.pdf [file d0tc02706e1.pdf]

## **Low defects density CsPbBr<sub>3</sub> single crystals grown by an additive assisted method for gamma-ray detection**

Yuanxiang Feng<sup>1</sup>, Lei Pan<sup>2</sup>, Haotong Wei<sup>1</sup>, Ye Liu<sup>1</sup>, Zhenyi Ni<sup>1</sup>, Jingjing Zhao<sup>1</sup>, Peter N. Rudd<sup>1</sup>,

Lei R. Cao<sup>2</sup>, Jinsong Huang<sup>1\*</sup>

<sup>1</sup> Department of Applied Physical Sciences, The University of North Carolina at Chapel Hill,  
Chapel Hill, North Carolina, 27514, USA

<sup>2</sup> Nuclear Engineering Program, Department of Mechanical and Aerospace Engineering, The  
Ohio State University, Columbus, Ohio, 43210, USA

## Supplementary Information

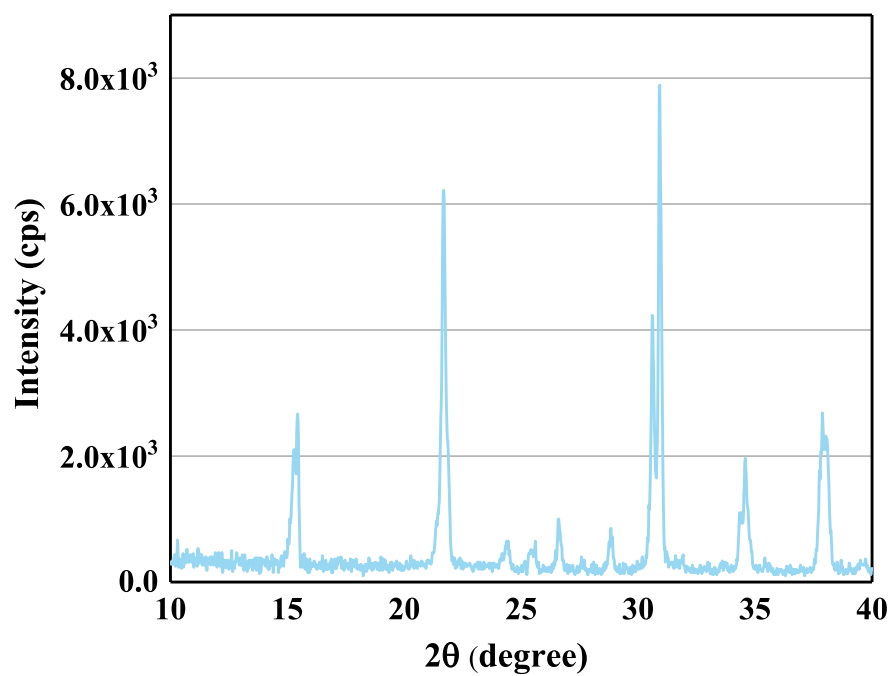

*Supplementary Figure 1. XRD pattern of CsPbBr<sub>3</sub> powder grown with CB.*

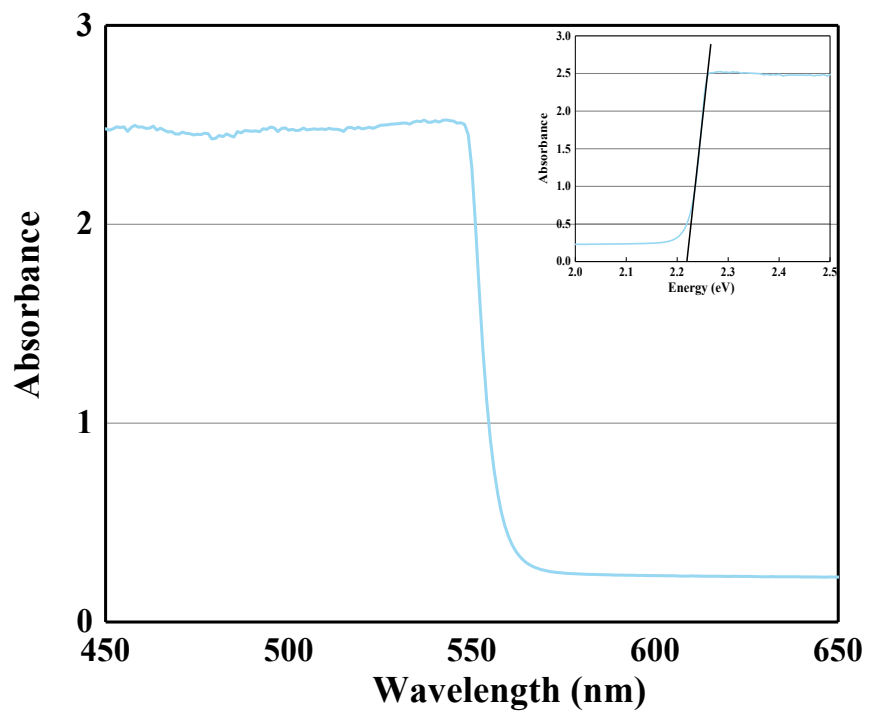

*Supplementary Figure 2. UV-vis absorption spectrum of of  $\text{CsPbBr}_3$  single crystal grown with CB. The inset is the Tauc plot which shows the optical bandgap about 2.22 eV.*

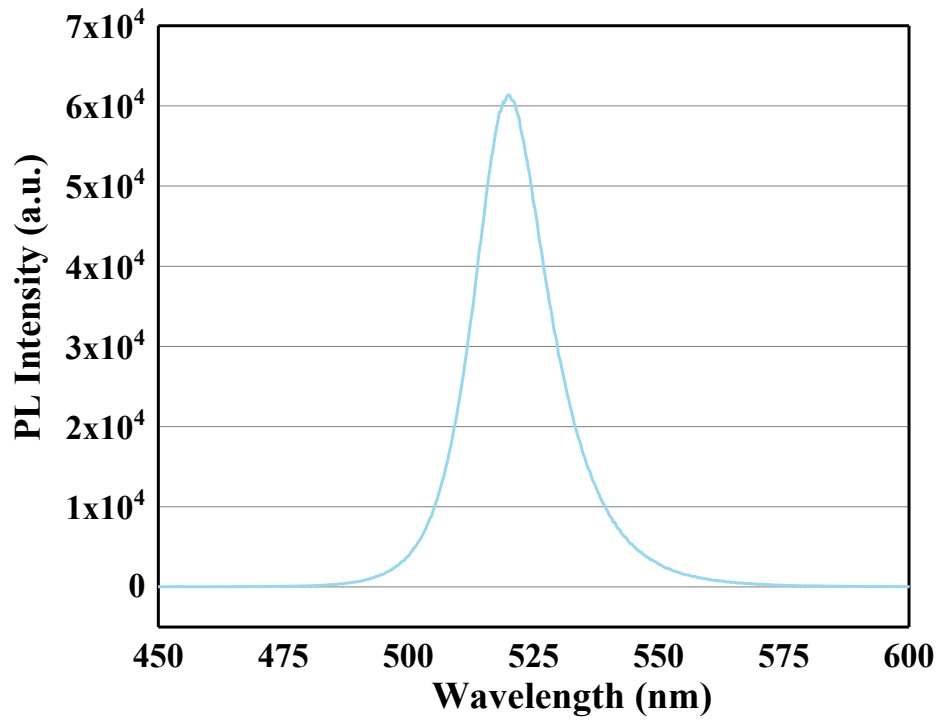

*Supplementary Figure 3. PL spectrum of CsPbBr<sub>3</sub> single crystal grown with CB. PL was measured at 25 °C.*

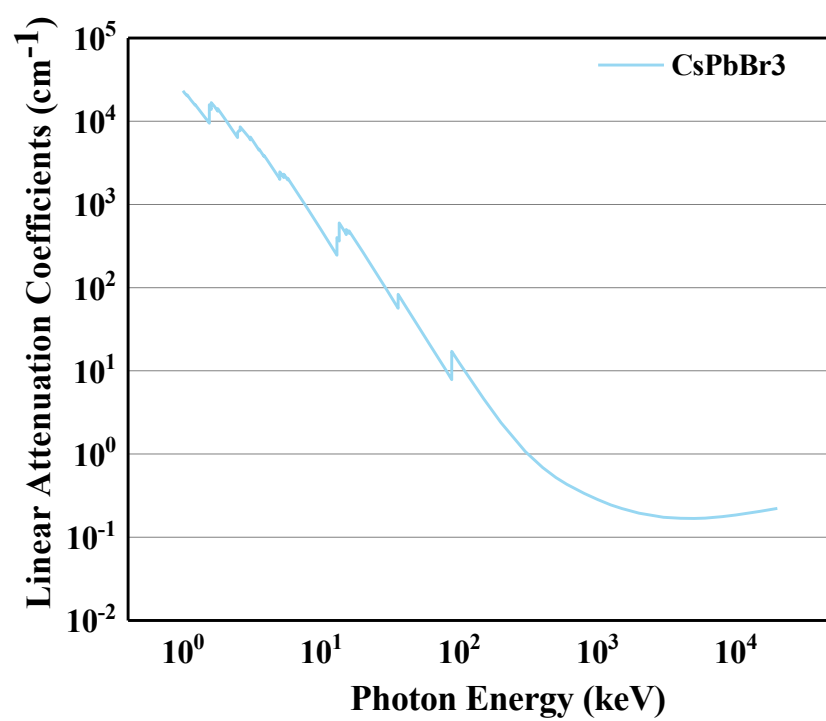

*Supplementary Figure 4. Linear attenuation coefficients of CsPbBr<sub>3</sub> perovskite versus photon energy.*

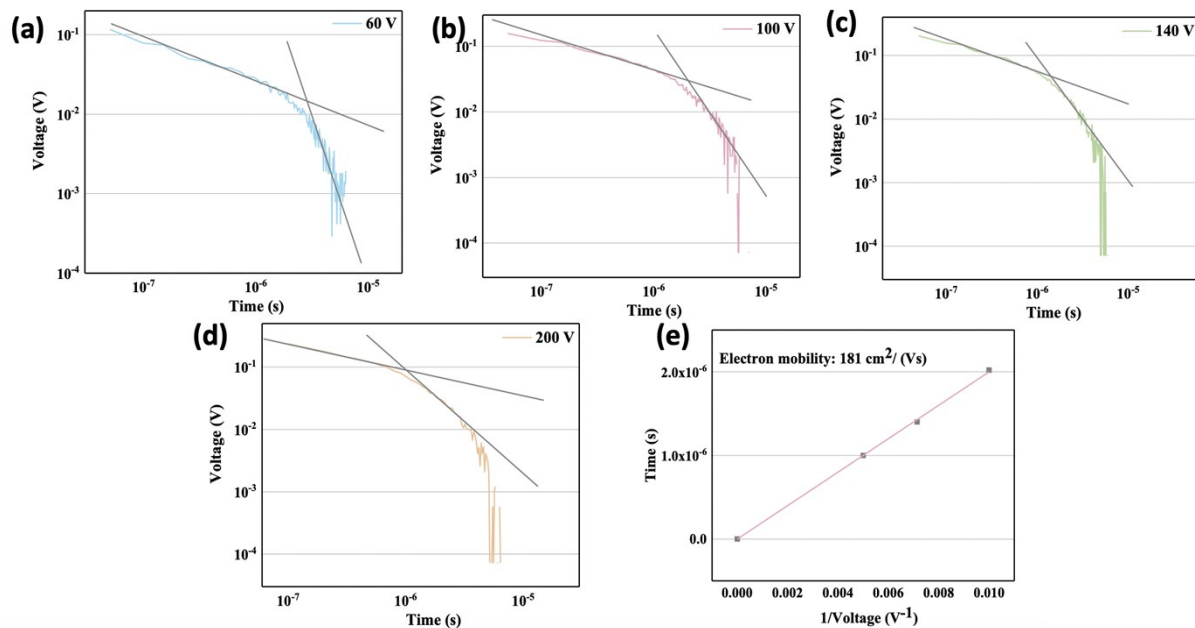

*Supplementary Figure 5. Electron induced transient current of CB-assisted CsPbBr<sub>3</sub> single crystal detector under (a) 60 V, (b) 100 V, (c) 140 V, and (d) 200 V. (e) Electron mobility of CB-assisted CsPbBr<sub>3</sub> single crystal detector estimated by linear fitting  $\tau_{transit}$  verse  $1/V$*

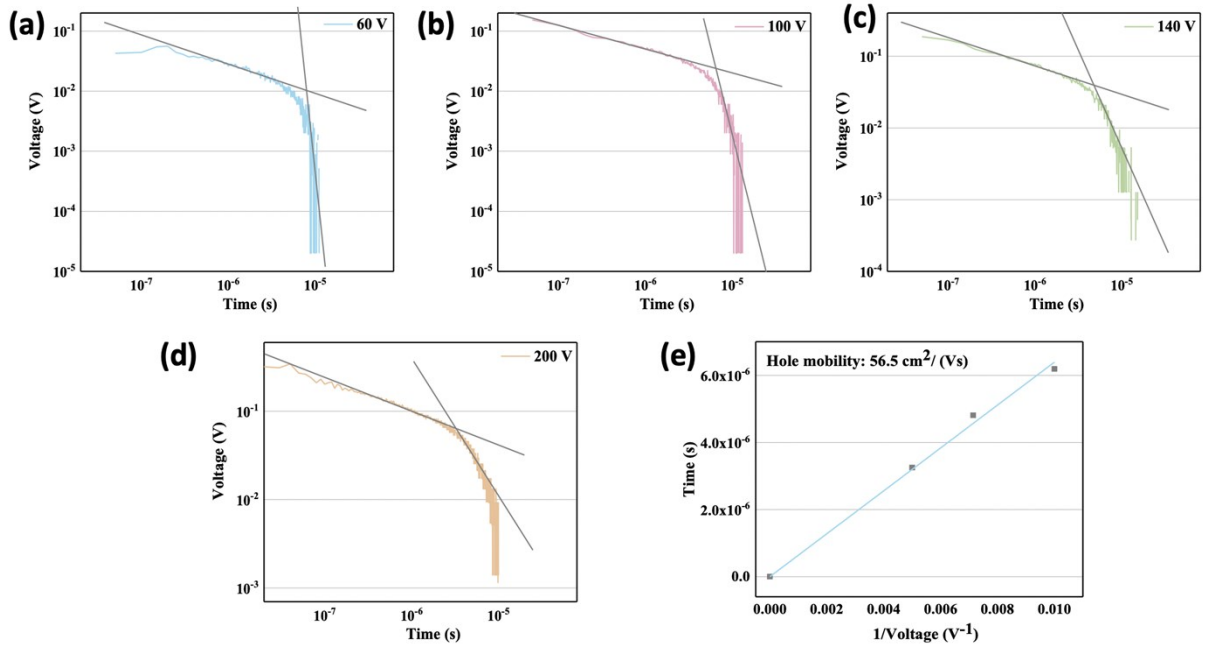

Supplementary Figure 6. Hole induced transient current of CB-assisted CsPbBr<sub>3</sub> single crystal detector under (a) 60 V, (b) 100 V, (c) 140 V, and (d) 200 V. (e) Hole mobility of CB-assisted CsPbBr<sub>3</sub> single crystal detector estimated by linear fitting  $\tau_{transit}$  verse  $1/V$ .

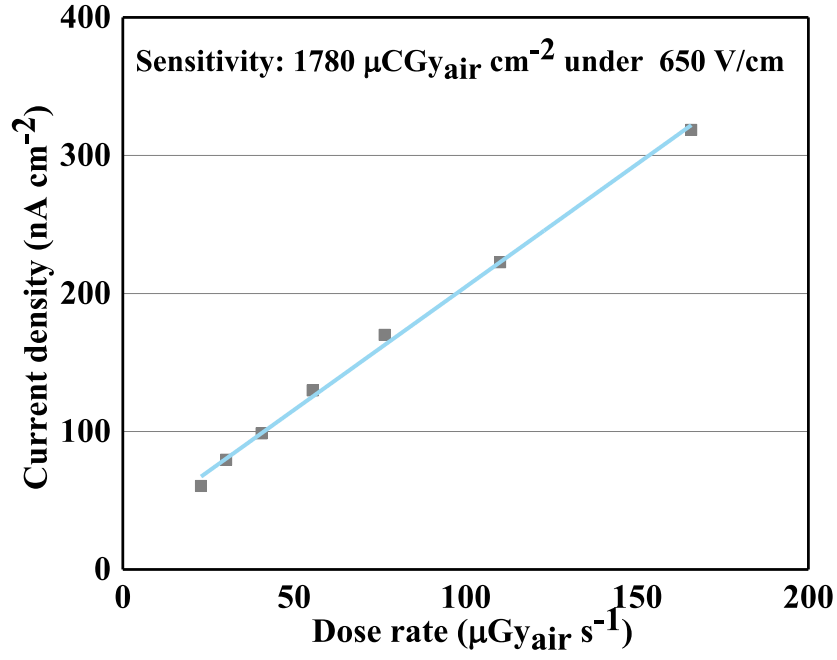

*Supplementary Figure 7. Sensitivity of detector based on CB-assisted CsPbBr<sub>3</sub> single crystal. The energy of X-ray is 60 keV, and the CB-assisted CsPbBr<sub>3</sub> is biased at 650 V/cm.*
